# Supplementary material for: Systemic influences of mammary cancer on monocytes in mice
Source: bioRxiv or medRxiv preprint supplement (doi:10.1101/2021.12.24.474104), 2021-12-24

## **Supplementary Figure Legends**

**Supplementary Figure 1:** Flow cytometric gating and cell-sorting strategy for blood monocytes and neutrophils used in Figure 1, 2, 4 and 6.

**Supplementary Figure 2:** Flow cytometric gating strategy for BM monocytes in Figure 1 and Figure 2E.

**Supplementary Figure 3:** Flow cytometric gating strategy for identification and sorting of BM Ly6C<sup>high</sup> monocytes, MDPs and cMoPs in Figure 2A, C and Figure 6.

**Supplementary Figure 4:** Flow cytometric gating strategy for identification and sorting of BM LK in Figure 2A and B.

**Supplementary Figure 5:** Flow cytometric gating strategy for identification of BM myeloid progenitors in Figure 2D.

**Supplementary Figure 6:** Flow cytometric gating strategy for identification of splenic Ly6C<sup>high</sup> monocytes and MDP in Figure 3.

**Supplementary Figure 7:** Identification of BrdU<sup>+</sup> monocytes in the blood (A), BM (B) and spleen (C) in Figure 2D-F and Figure 3F. Example staining taken at 24 (A) or 1 (B-C) hrs post-injection of BrdU.

**Supplementary Figure 8:** Bulk RNA sequencing of Ly6C<sup>high</sup> and Ly6C<sup>low</sup> blood monocytes from C57BL/6 mice with late cancer and littermate controls. *(A) PCA of all monocytic samples derived from total RNAseq (B) PCA of Ly6C<sup>low</sup> monocytes derived from total RNAseq*

Supplementary Figure 1

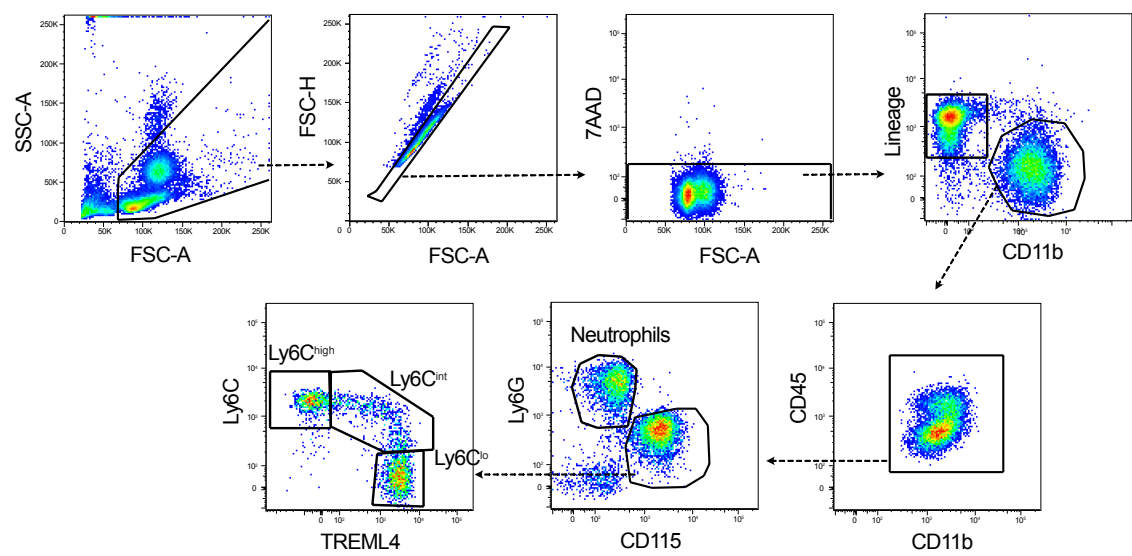

Supplementary Figure 2

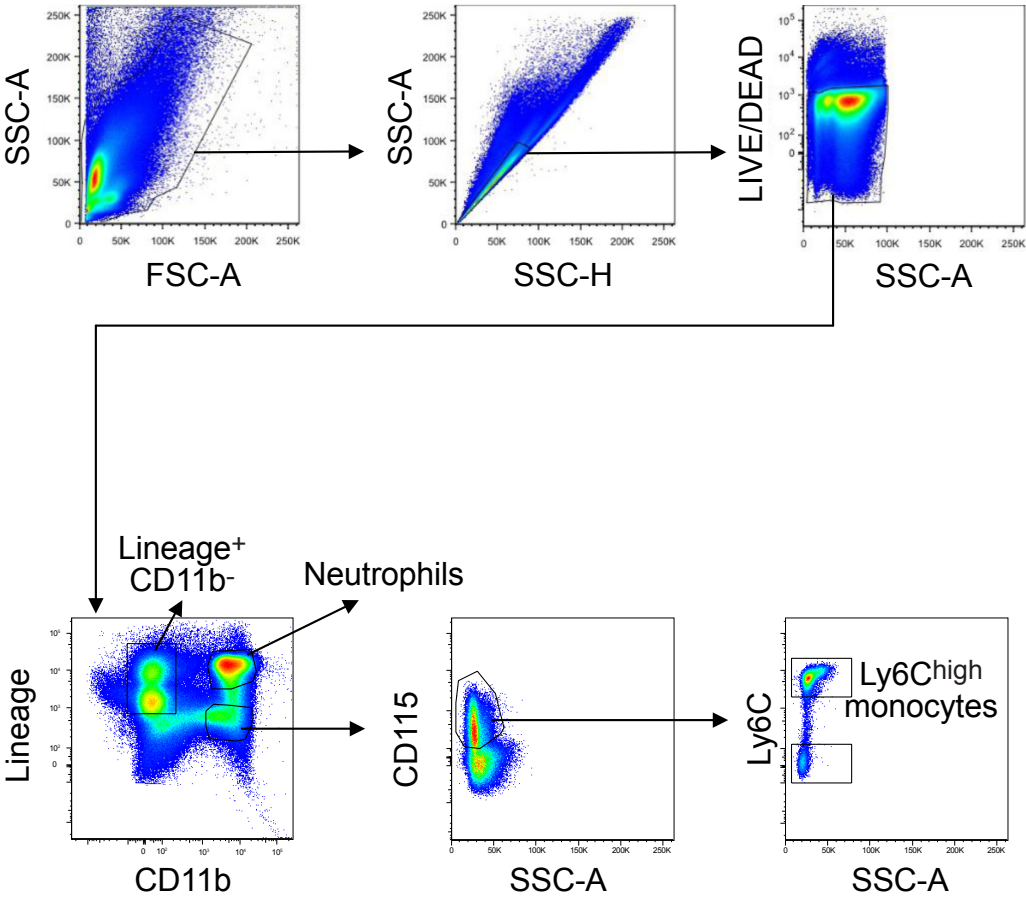

Supplementary Figure 3

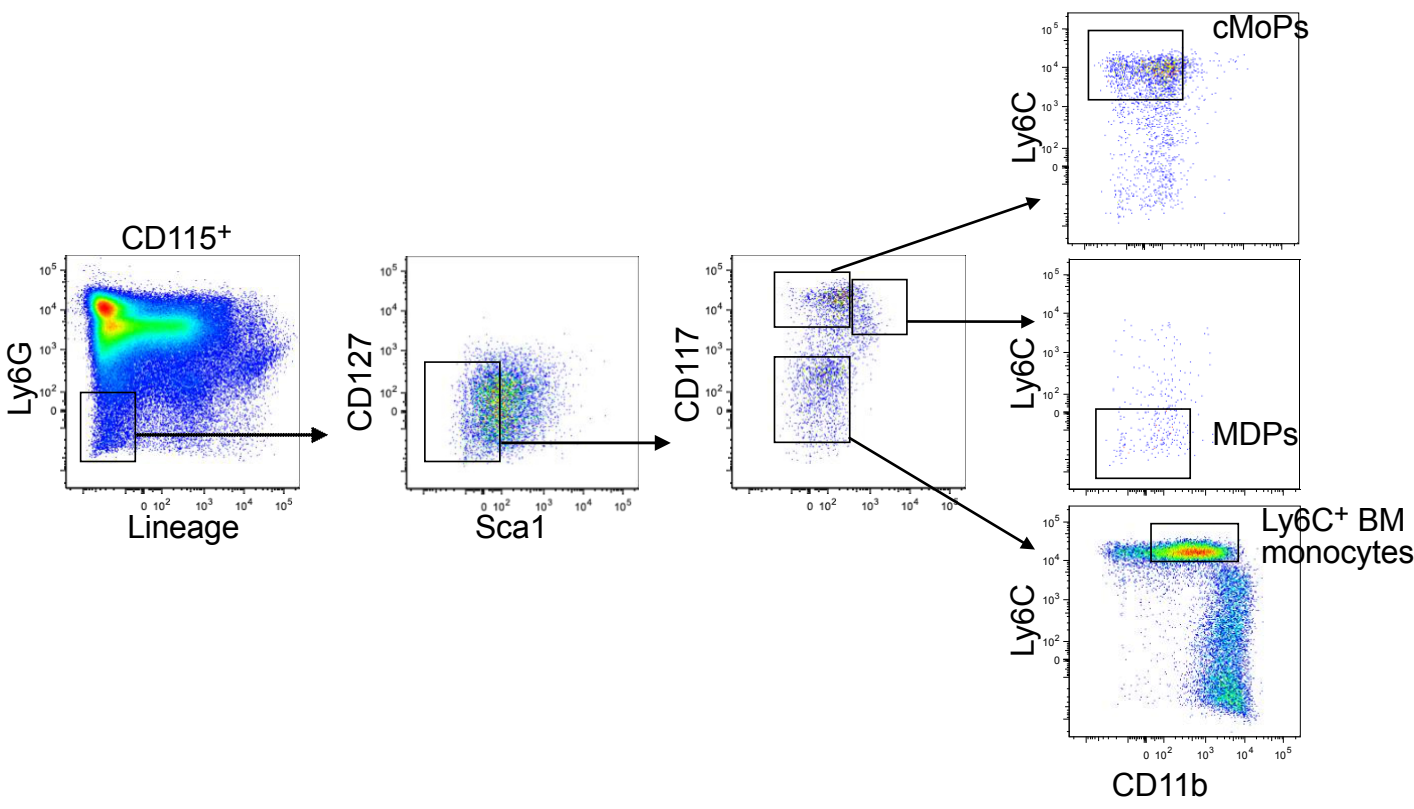

**Supplementary Figure 4**

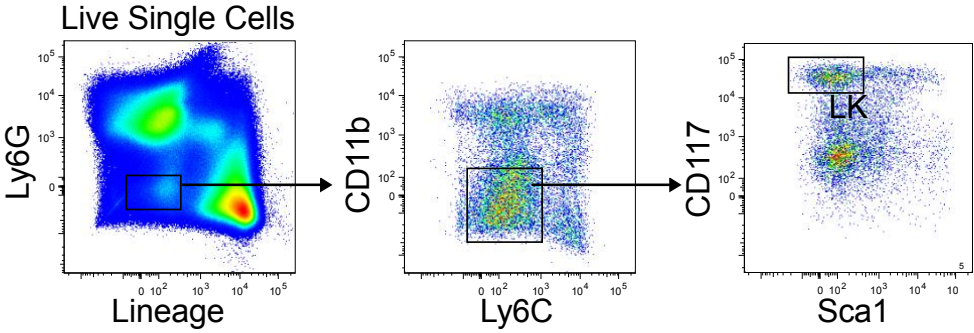

**Supplementary Figure 5**

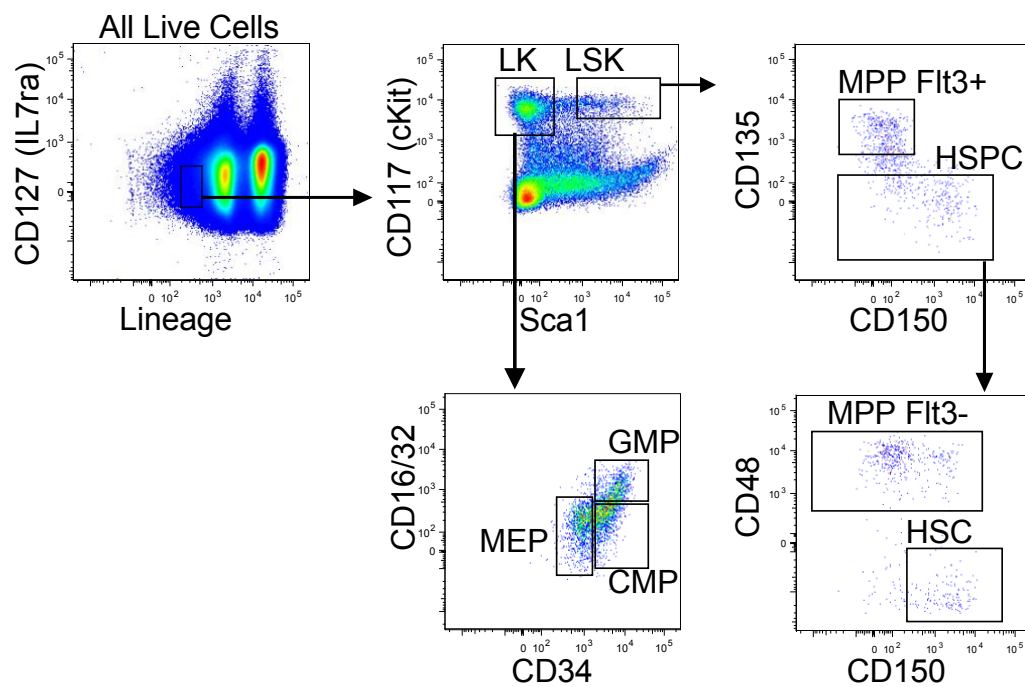

Supplementary Figure 6

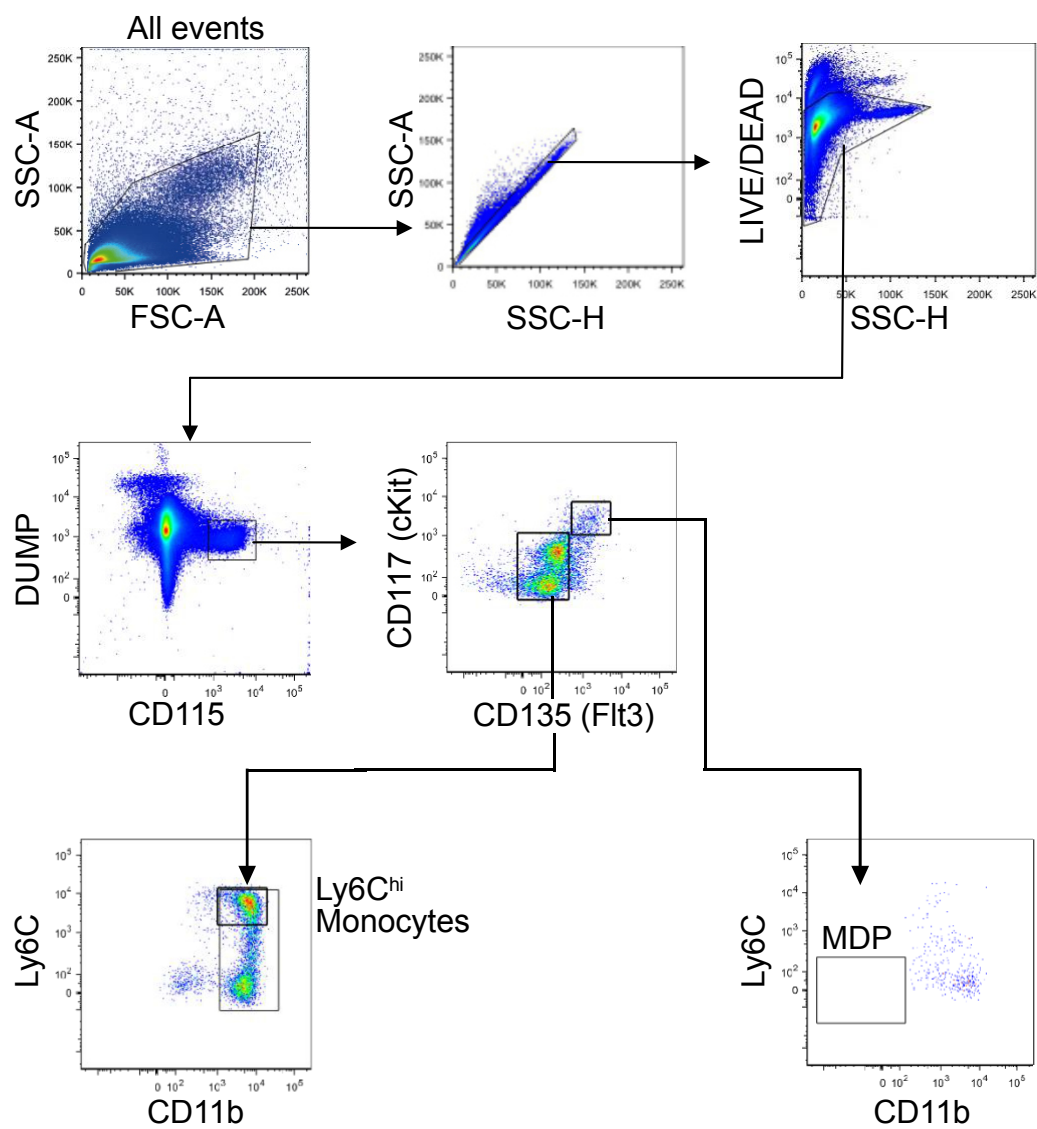



## Supplementary Figure 7

A

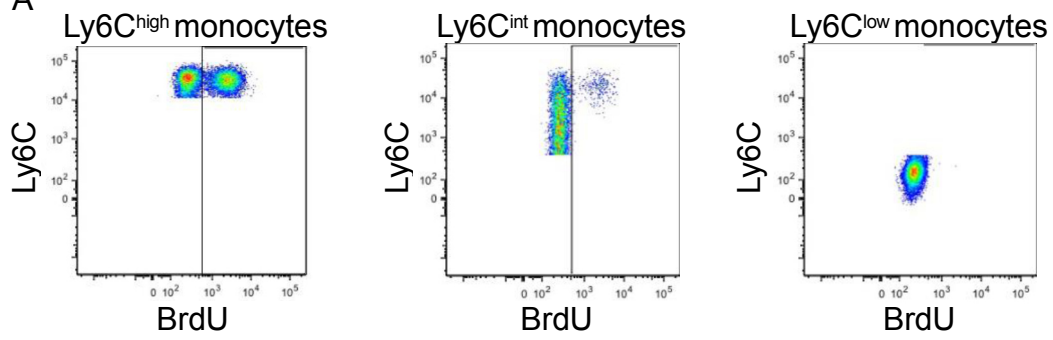

B All CD115<sup>+</sup> monocytes

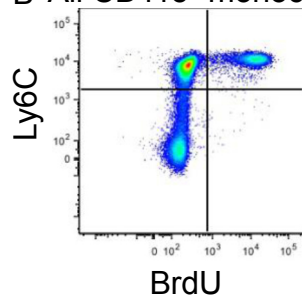

C Ly6C<sup>high</sup> monocytes

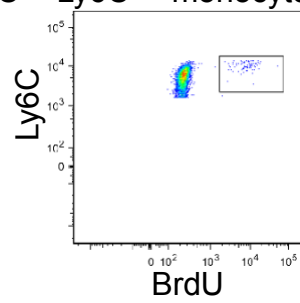

Supplementary Figure 8

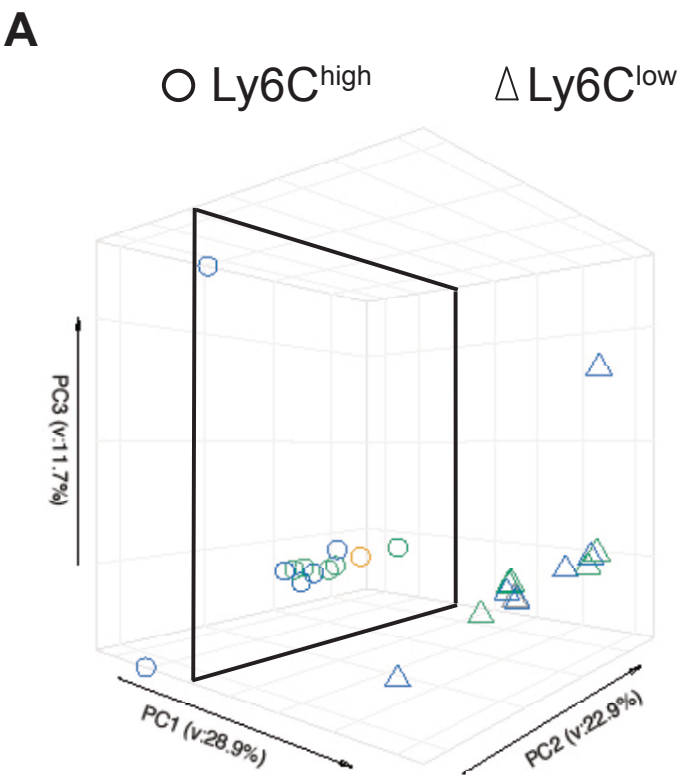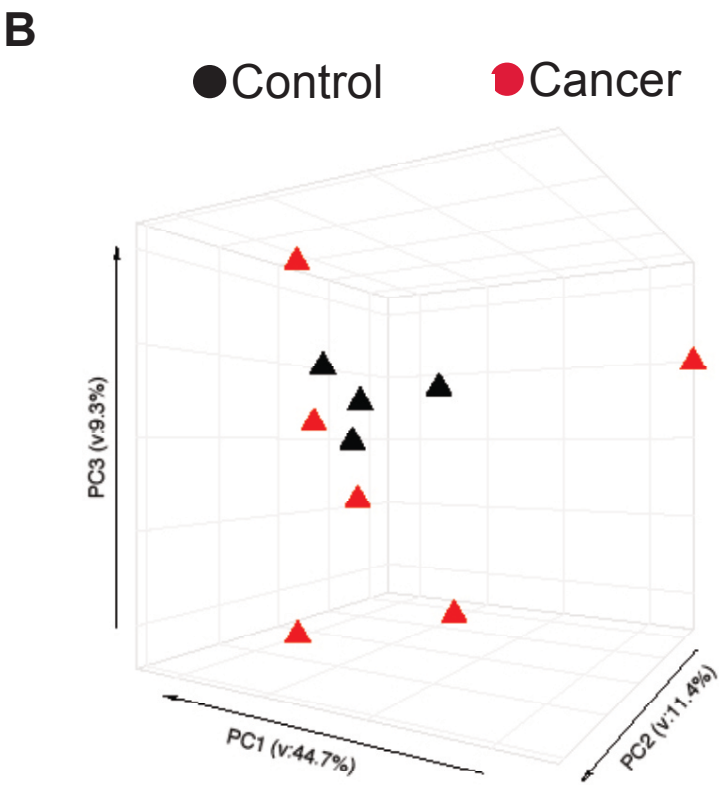

Supplement: Supplementary file [file media-1.pdf]
